# Supplementary material for: Thermally enhanced substrate design for flexible thermoelectric devices via ultrasonic welding
Source: Royal Society of Chemistry journal article supplement (doi:10.1039/d4ta08406c), 2025-01-01
Supplement: d4ta08406c1.pdf [file d4ta08406c1.pdf]

## Supporting Information for:

### Thermally Enhanced Substrate Design for Flexible Thermoelectric Devices via Ultrasonic Welding

Yuting Wang<sup>1,2</sup>, Dongwang Yang<sup>1,2,4\*</sup>, Dan Li<sup>3</sup>, Jianan Lyu<sup>1,2</sup>, Yutian Liu<sup>1,2</sup>, Mingqi Zhang<sup>1,2</sup>, Weijie Gou<sup>1,2</sup>, Yunfei Gao<sup>1,2</sup>, Zinan Zhang<sup>1,2</sup>, Chenyang Li<sup>1,2</sup>, Yonggao Yan<sup>1,2</sup>, Yong Xiao<sup>3\*</sup>, Xinfeng Tang<sup>1,2\*</sup>

<sup>1</sup>Hubei Longzhong Laboratory, Wuhan University of Technology Xiangyang Demonstration Zone, Xiangyang 441000, China.

<sup>2</sup>State Key Laboratory of Advanced Technology for Materials Synthesis and Processing, Wuhan University of Technology, Wuhan 430070, China

<sup>3</sup>School of Materials Science and Engineering, Wuhan University of Technology, Wuhan 430070, China

<sup>4</sup>Wuhan University of Technology Advanced Engineering Technology Research Institute of Zhongshan City, Zhongshan 528400, China

\* Correspondence and requests for materials should be addressed to Dongwang Yang (ydongwang@whut.edu.cn), Yong Xiao (yongxiao@whut.edu.cn) or to Xinfeng Tang (tangxf@whut.edu.cn).

**This PDF includes:**

A. Figures S1 to S5

B. Videos S1 to S2

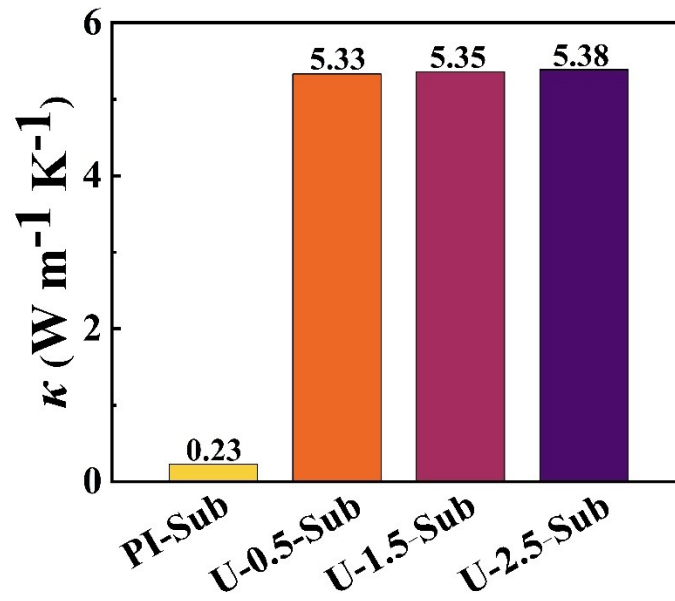

**Figure S1.** Thermal conductivity of the thermal conductive silicone pad-PI laminated substrate with the silicone pad of different thickness. PI-Sub: the PI substrate, U-0.5-Sub: laminated substrate with the silicone pad thickness of 0.5 mm, U-1.5-Sub: laminated substrate with the silicone pad thickness of 1.5 mm, U-2.5-Sub: laminated substrate with the silicone pad thickness of 2.5 mm.

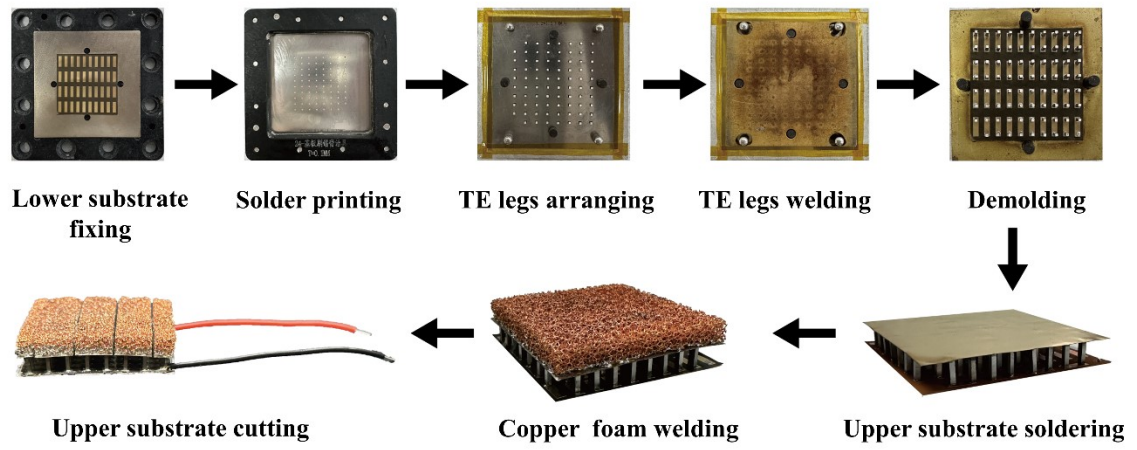

**Figure S2.** Fabrication process of the f-TED.

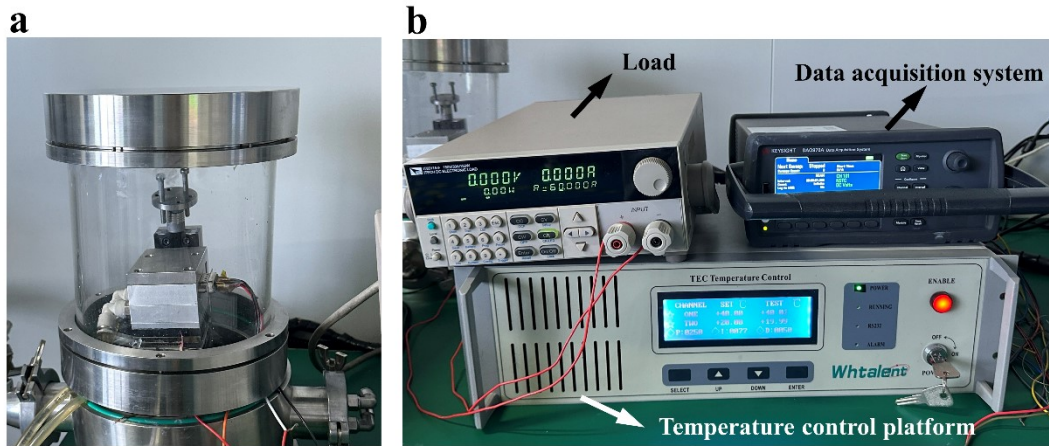

**Figure S3.** (a) Temperature control platform; (b) Output performance test equipment.

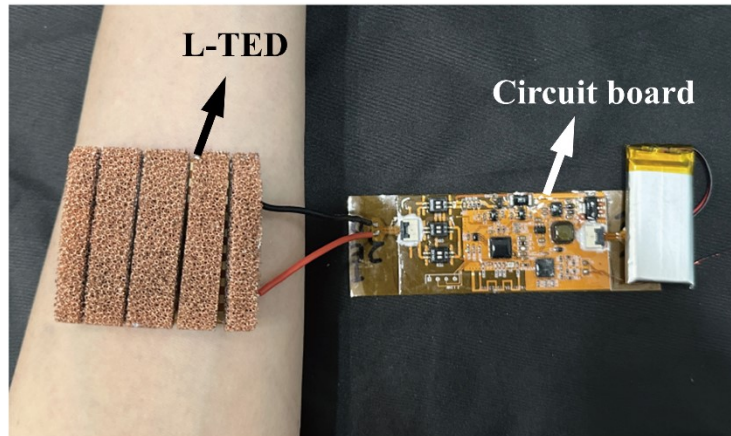

**Figure S4.** Circuit diagram of the wearable system.

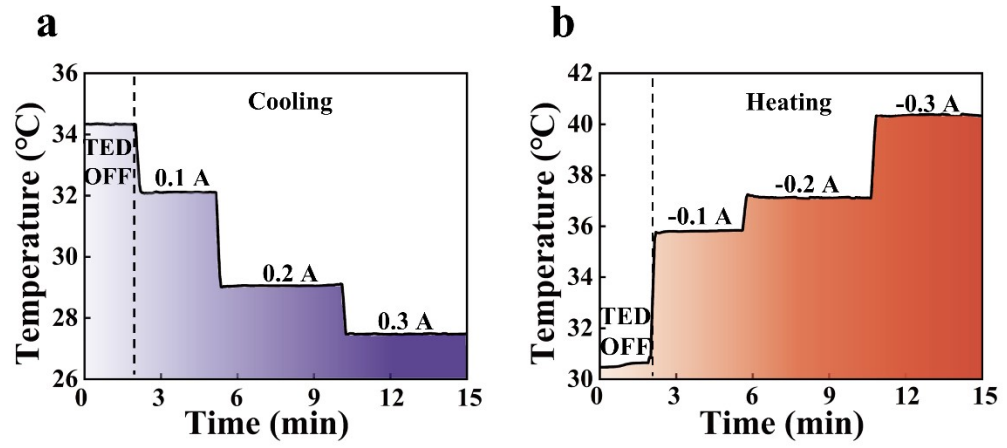

**Figure S5.** (a) Cooling performance of P-TED; (b) Heating performance of P-TED.

P-TED: the f-TED with the PI substrate.

## **B: Videos**

**Video S1.** Heating performance of the wearable system comprising L-TED, a control circuit board, and a mobile terminal.

**Video S2.** Cooling performance of the wearable system comprising L-TED, a control circuit board, and a mobile terminal.
